# Supplementary material for: Tunable molecular packing modes via H- or J-aggregates in the supramolecular helical nanostructures from an achiral C3 symmetric molecule
Source: Royal Society of Chemistry journal article supplement (doi:10.1039/d3sm00489a), 2023-01-01
Supplement: d3sm00489a1.pdf [file d3sm00489a1.pdf]

*Electronic Supplementary Information*

**Tunable molecular packing modes via H- or J-aggregates in the supramolecular helical nanostructures from an achiral  $C_3$  symmetric molecule**

Yi Lu<sup>a</sup>, Zhaocun Shen<sup>c</sup>, Changshuo Lian<sup>a</sup>, Jie Wu<sup>\*a</sup>, Minghua Liu<sup>\*b</sup>, Zongxia Guo<sup>\*a</sup>

<sup>a</sup>*Key Laboratory of Optic-electric Sensing and Analytical Chemistry for Life Science, MOE, College of Chemistry and Molecular Engineering, Qingdao University of Science and Technology, Qingdao, China, Shandong Key Laboratory of Biochemical Analysis, College of Chemistry and Molecular Engineering, Qingdao University of Science and Technology, Qingdao, China.*

<sup>b</sup>*Beijing National Laboratory for Molecular Science, CAS Key Laboratory of Colloid, Interface and Chemical Thermodynamics, Institute of Chemistry, Chinese Academy of Sciences, Beijing 100190, P. R. China.*

<sup>c</sup>*College of Materials Science and Engineering, State Key Laboratory of Bio-Fibers and Eco-Textiles, Shandong Collaborative Innovation Center of Marine Biobased Fibers and Ecological Textiles, Institute of Marine Bio-based Materials, Qingdao University, Qingdao 266071, P. R. China*

<sup>\*</sup> *E-mail: wujie@qust.edu.cn, [liumh@iccas.ac.cn](mailto:liumh@iccas.ac.cn), [zxguo@qust.edu.cn](mailto:zxguo@qust.edu.cn).*

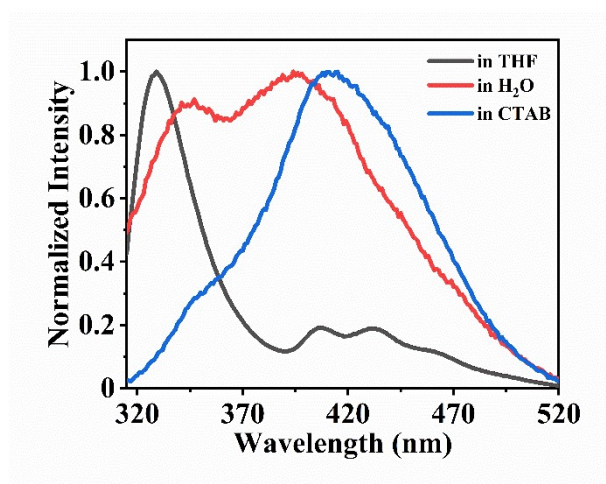

**Fig. S1** FL spectra of BTECM in THF, H<sub>2</sub>O and CTAB aqueous solution (1.2 mM) after 240 h of aging at 25°C, all of the spectra were normalized by the maximum emission of black line.

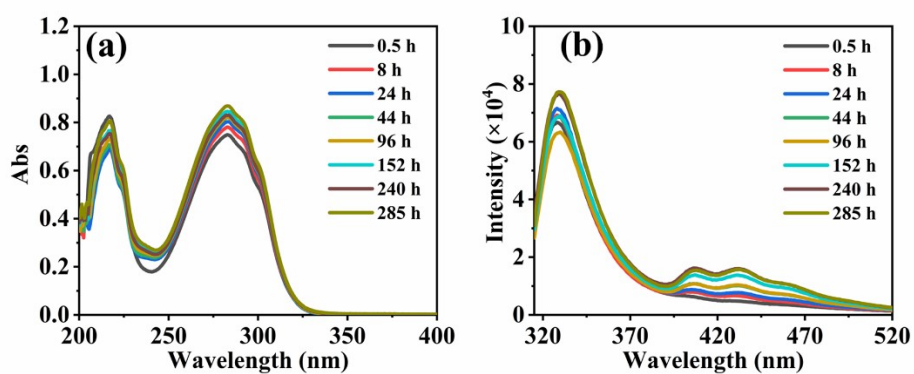

**Fig. S2** UV-Vis spectra (a) and FL spectra (b) of BTECM in THF as a function of the aging time at 25°C.

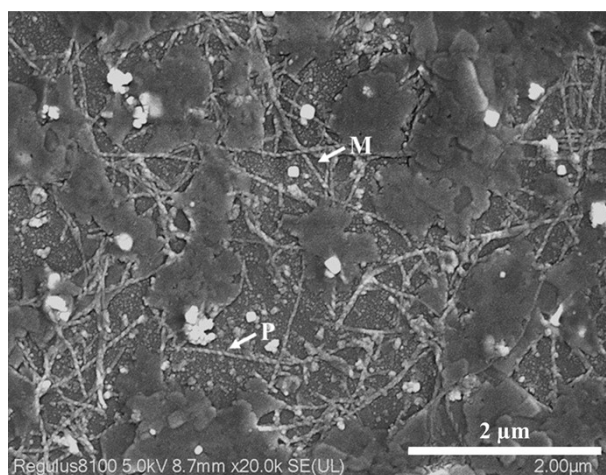

**Fig. S3** SEM images of the assembled nanostructures of BTECM in CTAB aqueous solution (1.2 mM) after 8 h of aging at 25°C.

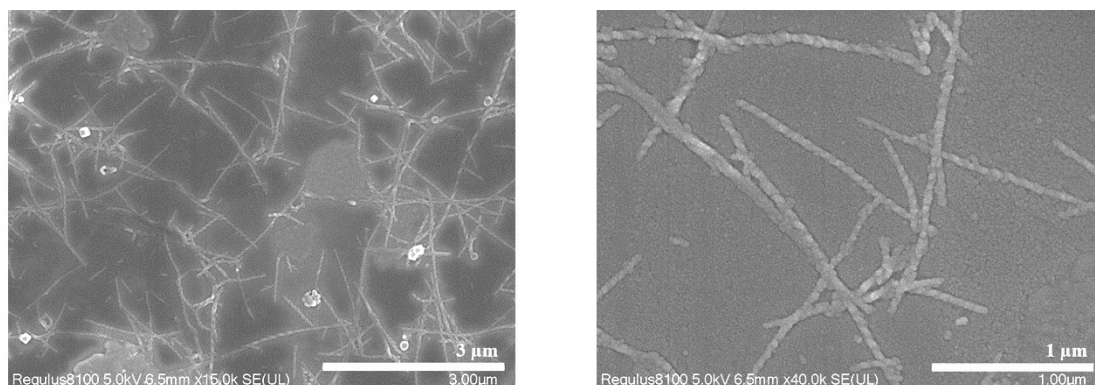

**Fig. S4** SEM images of the assembled nanostructures of BTECM in CTAB aqueous solution (1.2 mM) after 240 h of aging at 25°C.

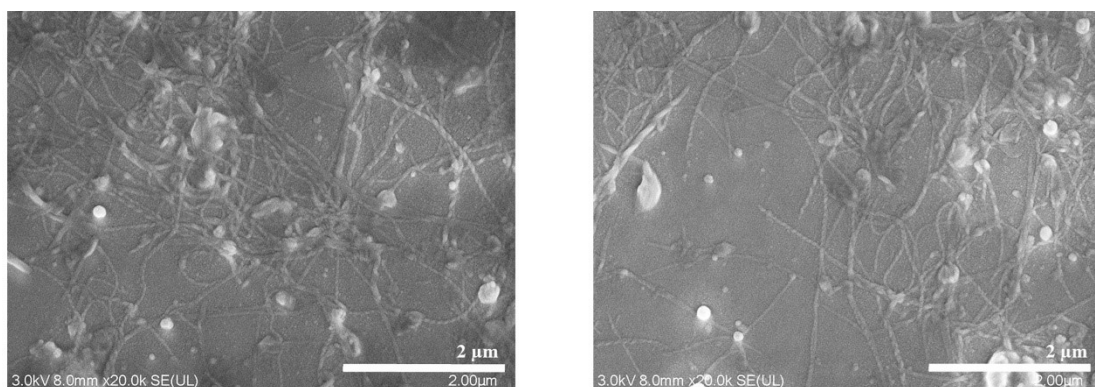

**Fig. S5** SEM images of the assembled nanostructures of BTECM in H<sub>2</sub>O after 330 h of aging at 25°C.

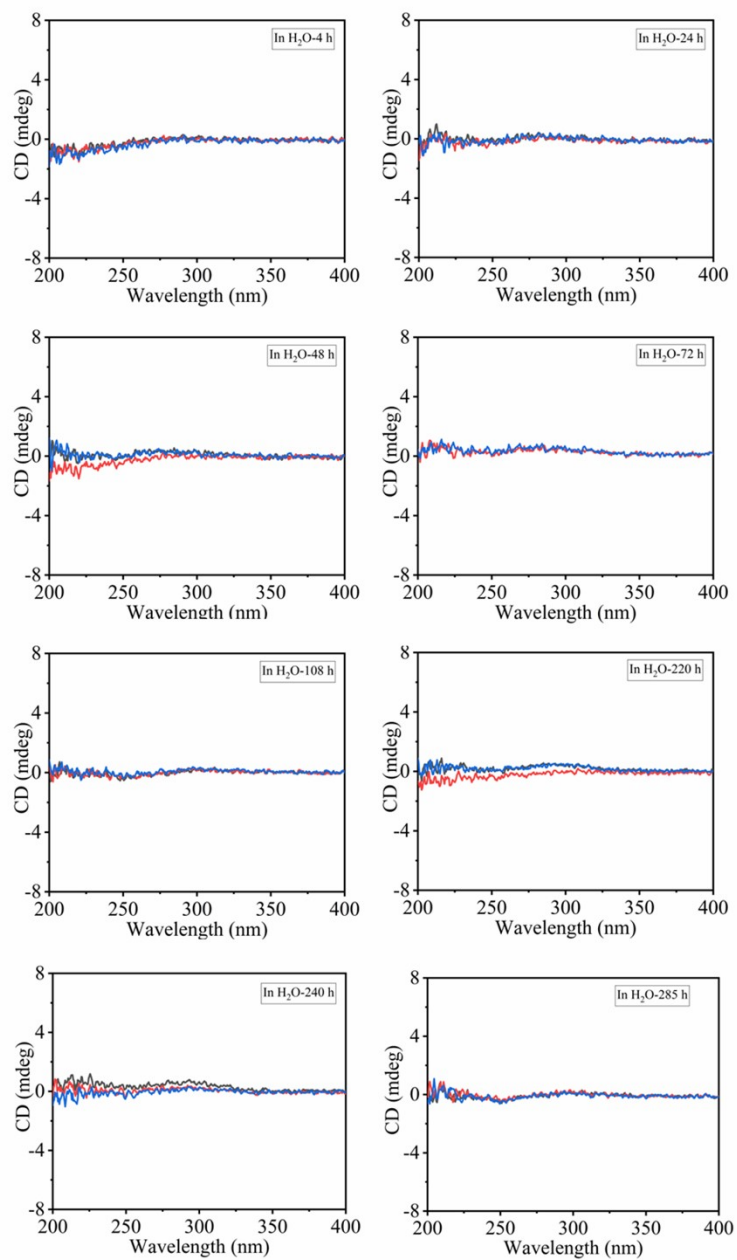

**Fig. S6** CD spectra of BTECM in H<sub>2</sub>O upon aging at 25°C.

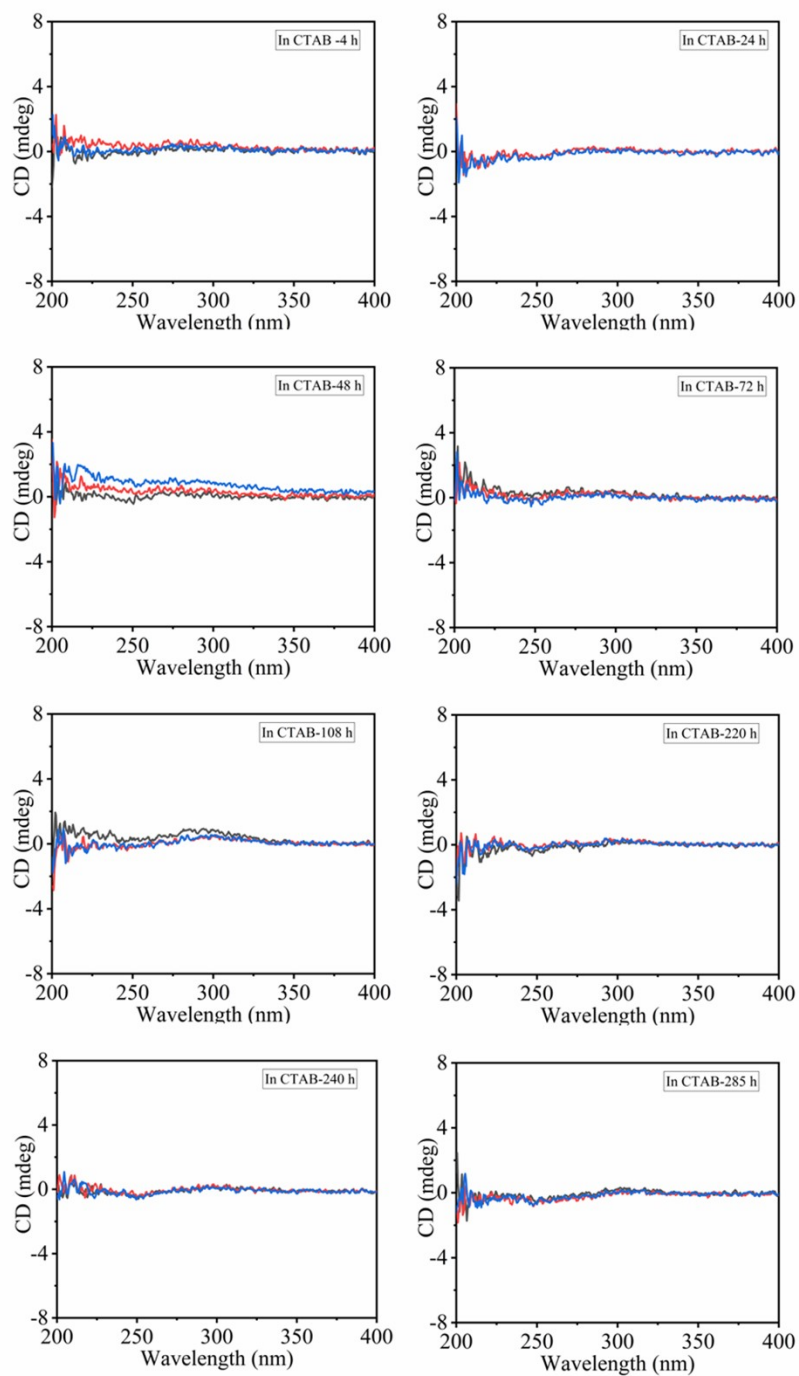

**Fig. S7** CD spectra of BTECM in CTAB aqueous solution upon aging at 25°C.

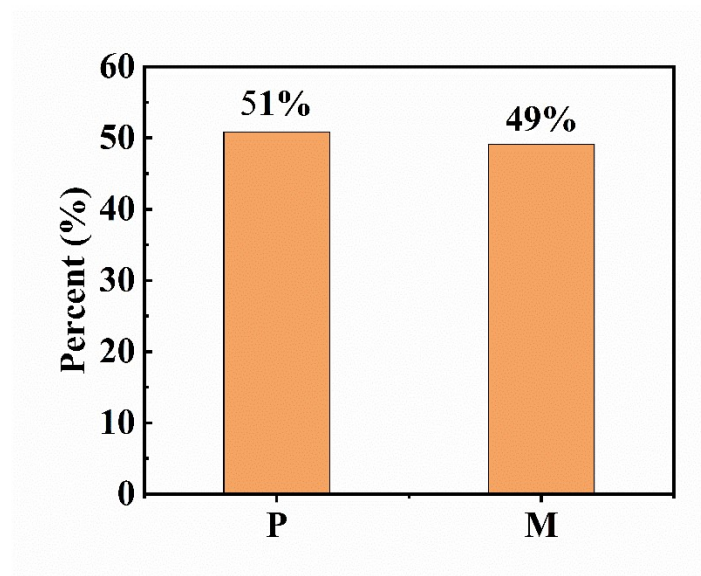

**Fig. S8** The statistical distributions of twists obtained from 178 helical structures by SEM measurement in CTAB aqueous solution after 240 h of aging at 25°C.

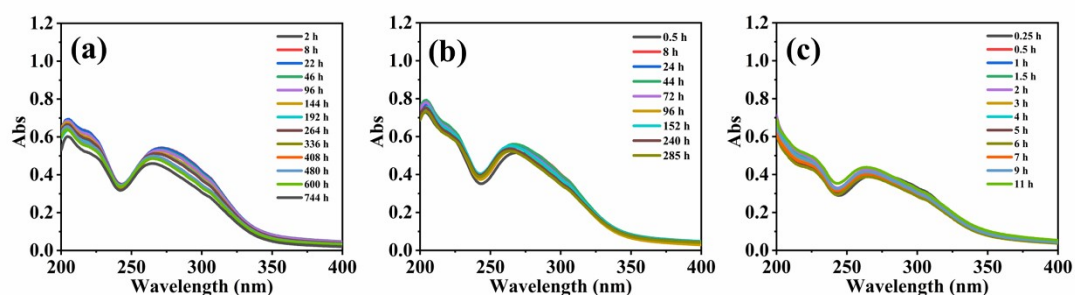

**Fig. S9** UV-Vis spectra of BTECM in H<sub>2</sub>O as a function of aging times at 10 (a), 25 (b) and 40°C (c).

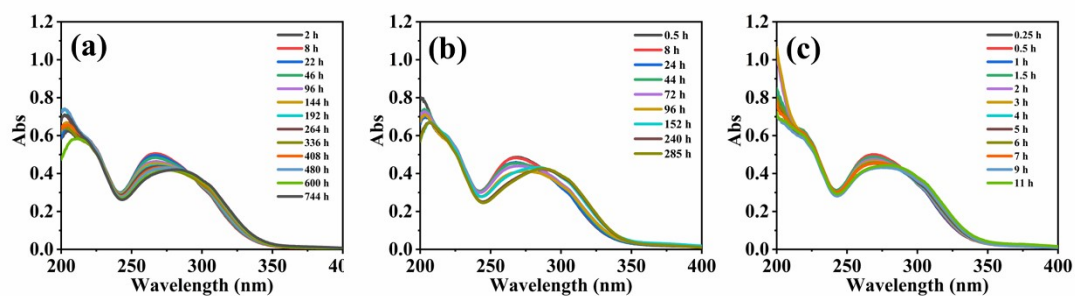

**Fig. S10** UV-Vis spectra of BTECM in CTAB aqueous solution as a function of aging times at 10 (a), 25 (b) and 40°C (c).

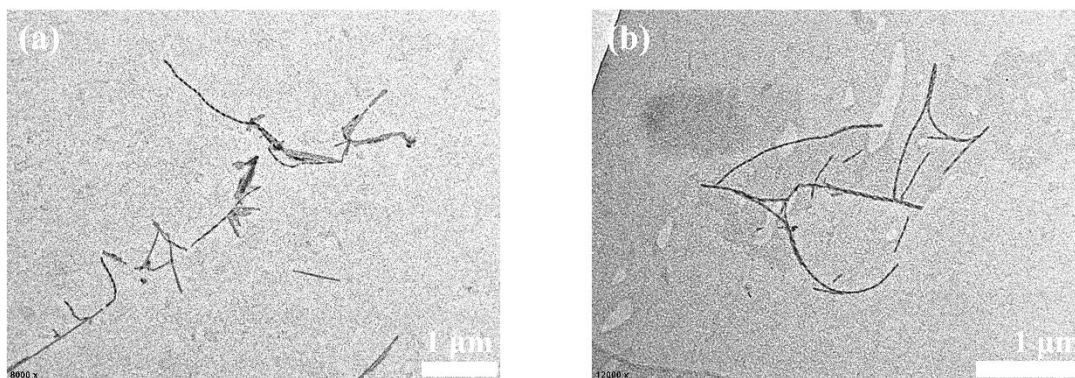

**Fig. S11** TEM images of the assembled nanostructures of BTECM in H<sub>2</sub>O (a) and CTAB aqueous solution (b) after 600 h of aging at 10°C.

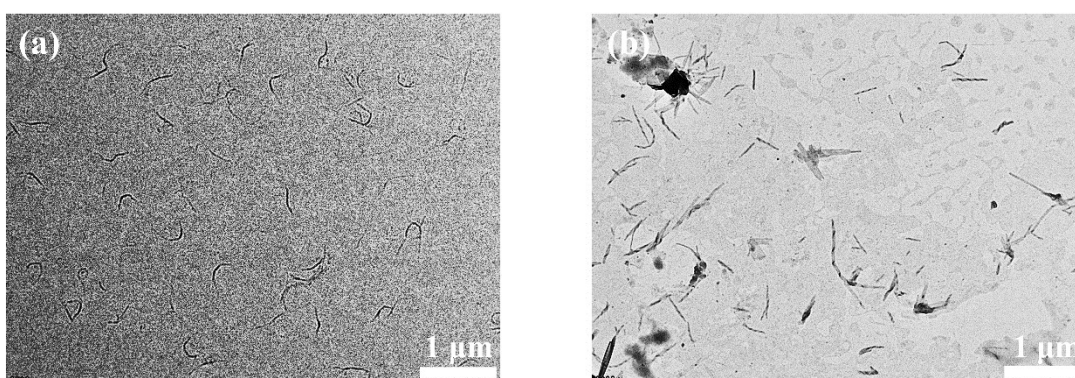

**Fig.S12** TEM images of the assembled nanostructures of BTECM in H<sub>2</sub>O after 15 min (a) and 2 h (b) of aging at 40°C.

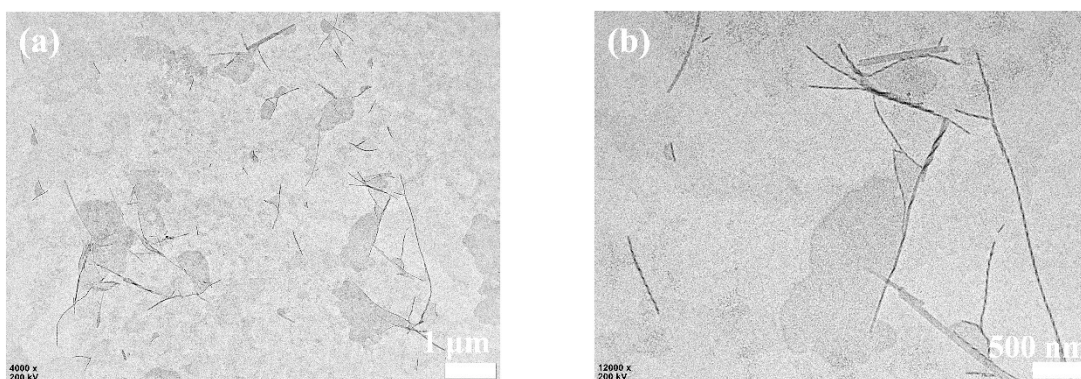

**Fig.S13** TEM images of the assembled nanostructures of BTECM in CTAB aqueous solution after 2 months of aging at 25°C.

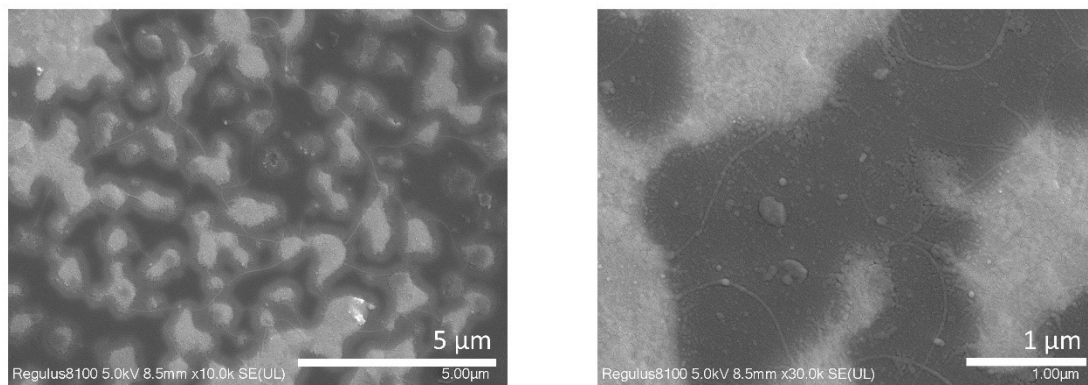

**Fig. S14** SEM images of BTECM in THF (1.2 mM) at 25°C.
